# Supplementary material for: RNF43 truncations trap CK1 to drive niche‐independent self‐renewal in cancer
Source: PubMed Central journal article supplement (PMC7503102; doi:10.15252/embj.2019103932), 2020-08-10
Supplement: EMBJ-39-e103932-s001.pdf [file EMBJ-39-e103932-s001.pdf]

# **RNF43 truncations trap CK1 to drive niche-independent self-renewal in cancer**

**Spit et al. 2020**

## **Appendix**

### **Table of contents**

|                           |               |
|---------------------------|---------------|
| <b>Appendix Figure S1</b> | <b>Page 1</b> |
| <b>Appendix Figure S2</b> | <b>Page 2</b> |
| <b>Appendix Figure S3</b> | <b>Page 3</b> |
| <b>Appendix Figure S4</b> | <b>Page 4</b> |
| <b>Appendix Table S1</b>  | <b>Page 5</b> |
| <b>Appendix Table S2</b>  | <b>Page 6</b> |
| <b>Appendix Table S3</b>  | <b>Page 7</b> |
| <b>Appendix Table S4</b>  | <b>Page 8</b> |

A

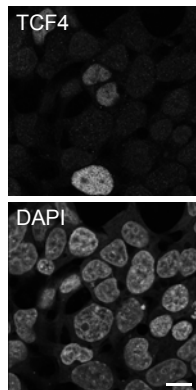

B

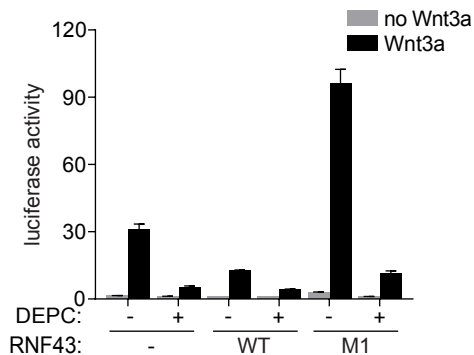

C

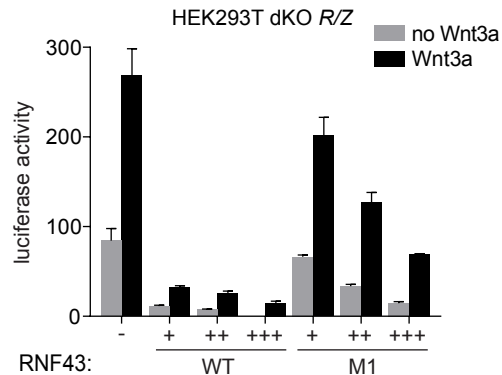

**Appendix Fig S1. TCF4 expression and the effects of RNF43 ligase dead mutant**

- A. Microscopy analysis of HEK293T cells expressing  $\Delta$ N-TCF4 revealed by anti-TCF4 for the experiment shown in Fig 2E. Scale bar represents 10  $\mu$ M.
- B.  $\beta$ -catenin-mediated reporter activity in HEK293T cells co-expressing Dvl-DEPC with RNF43 WT or the ligase dead mutant (M1) in the presence and absence of Wnt3a-CM. Average  $\beta$ -catenin-mediated reporter activities  $\pm$ s.d. in n = 2 independent wells are shown.
- C.  $\beta$ -catenin-mediated reporter activity in HEK293T double knock out (dKO) *RNF43/ZNRF3* (R/Z) cells expressing increasing amounts of RNF43 WT or the ligase dead mutant (M1) in the presence and absence of Wnt3a-CM. Average  $\beta$ -catenin-mediated reporter activities  $\pm$ s.d. in n = 2 independent wells are shown.

A

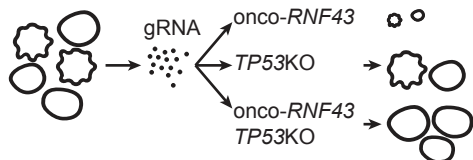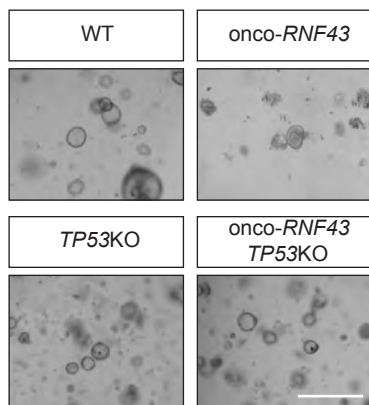

B

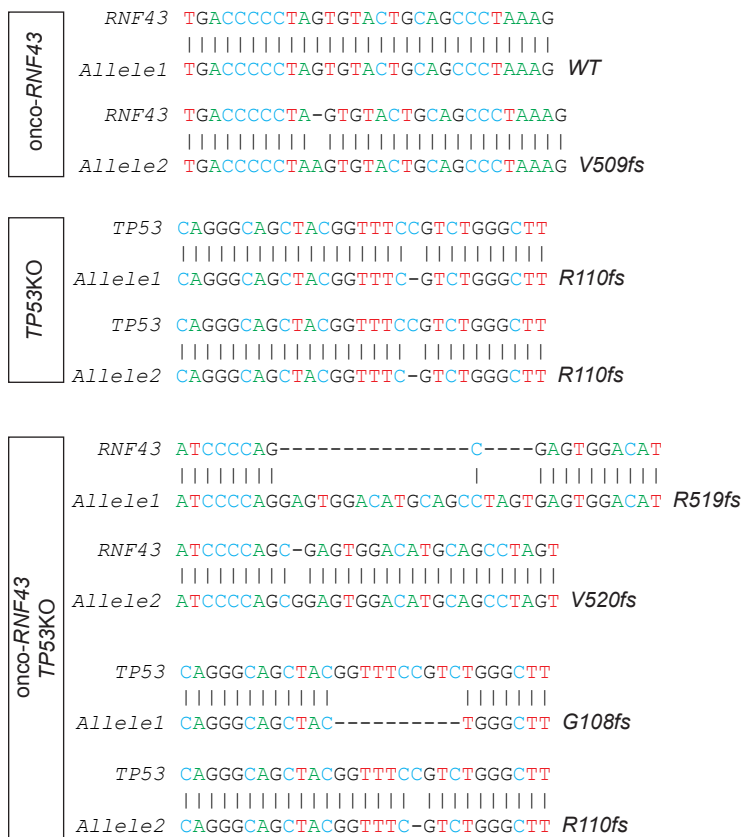

**Appendix Fig S2. Ablation of TP53 is permissive for growth of onco-RNF43-expressing organoids**

A. Strategy to engineer the indicated human colon organoid lines. Bright-field microscopy pictures of WT, mono-allelic onco-RNF43, TP53KO and onco-RNF43/TP53KO human colon organoids. Scale bar represent 400  $\mu$ m.

B. Sanger sequencing confirmation of onco-RNF43, TP53KO and onco-RNF43/TP53KO mutations in human colon organoids. Sequencing results for each allele compared to the wild type alleles are shown. The top line always represents the WT sequence (either TP53 or RNF43). The bottom lines represent the acquired sequences after CRISPR/Cas9 modulation, including various deletions resulting in frameshift mutants of both TP53 and RNF43.

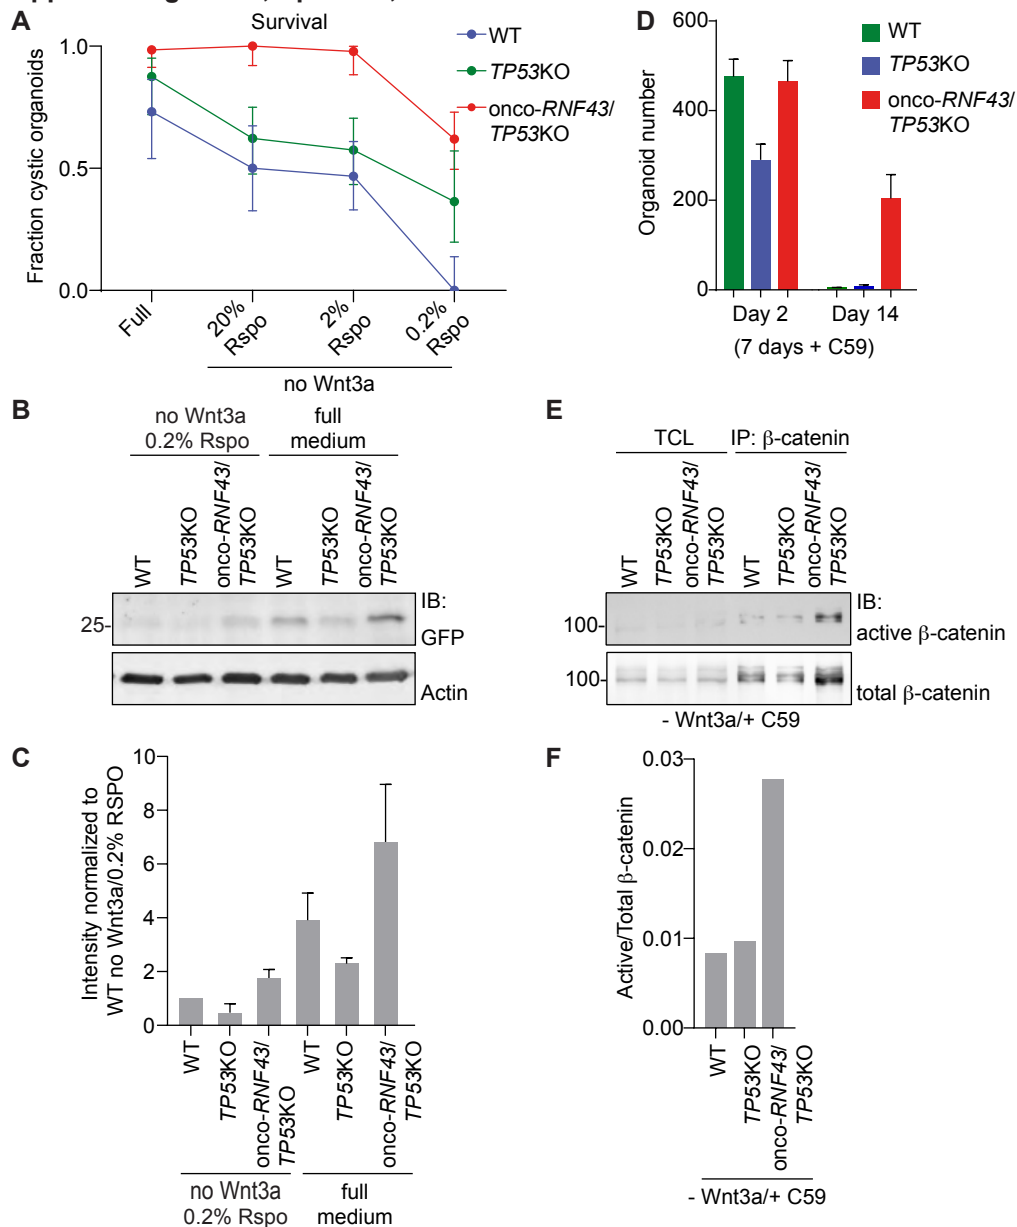

**Appendix Fig S3. Onco-RNF43/TP53KO organoids are resistant to low levels of Rspo and display higher levels of Wnt signaling**

- A. Fraction of WT, TP53KO and onco-RNF43/TP53KO human colon organoids that presented a cystic, proliferative morphology in the conditions described in Fig 4A. Error bars represent 95% confidence interval (Wilson/Brown test). n = 24-63 organoids per condition.
- B. Western blot analysis of WT, TP53KO and onco-RNF43/TP53KO human colon organoid lines grown in two different media and transduced with the TOP-GFP reporter. Organoids were lysed 6 days after splitting and the indicated antibodies were used for detection.
- C. Quantification of the Western blot presented in (B). GFP levels were quantified and normalized to actin. Graph represents the mean normalized to no Wnt3a/0.2% Rspo medium  $\pm$ s.d. of 2 independent experiments.
- D. Number of WT, TP53KO and onco-RNF43/TP53KO organoids at day 2 and day 14. Organoids were treated for 7 days with PORCN inhibitor C59 (1 $\mu$ M) after which the medium was replaced and organoids were split at day 9. Error bars represent  $\pm$ s.d. of the mean\ of n = 3 experiments.
- E. Western blot analysis of an endogenous  $\beta$ -catenin immunoprecipitation in WT, TP53KO and onco-RNF43/TP53KO human colon organoid lysates. Organoids were grown in full medium for 5 days and 24h before lysis placed in medium with no Wnt3a/no Rspo supplemented with PORCN inhibitor C59 (1  $\mu$ M). Both total levels of  $\beta$ -catenin and active, non-phosphorylated  $\beta$ -catenin were detected.
- F. Quantification of the Western blot presented in (E). Active, non-phosphorylated  $\beta$ -catenin levels were quantified and normalized to total levels of  $\beta$ -catenin. Graph represents the mean.

Figure 1B

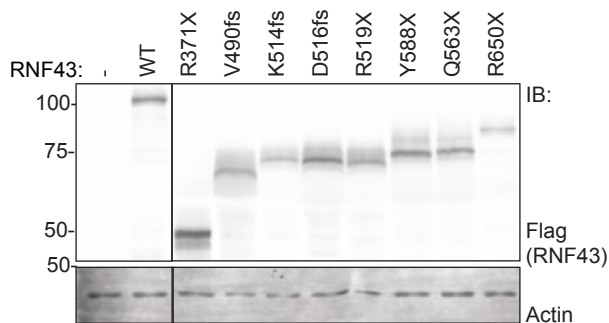

Figure 1G

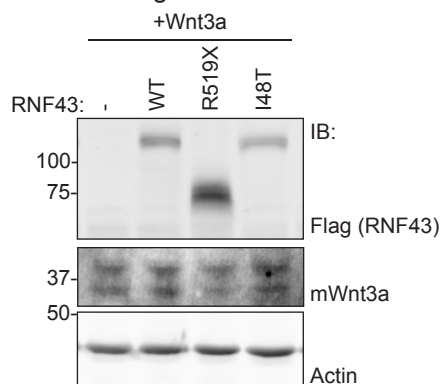

Figure 2A

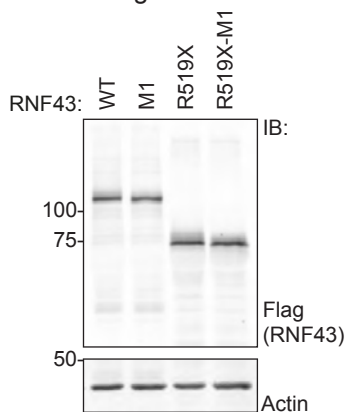

Figure 2C

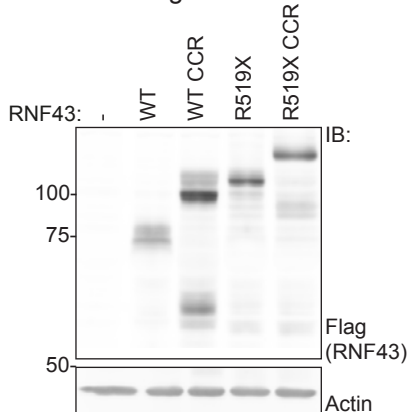

Figure 2D

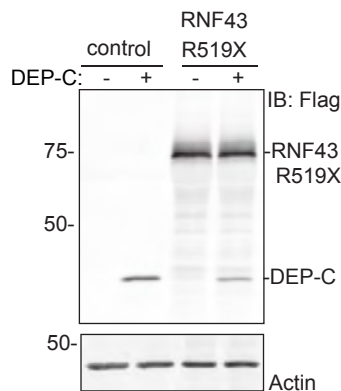

Figure 2E

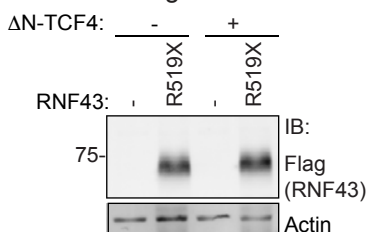

Figure 3E

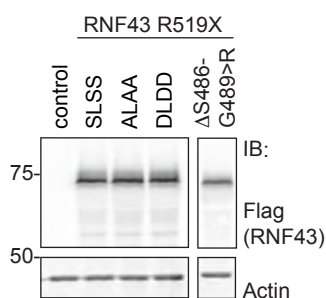

Figure EV1B

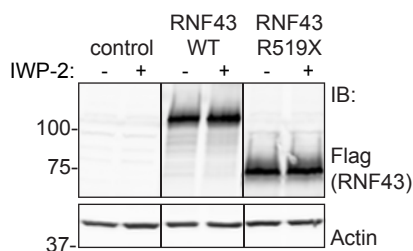

Figure EV1C

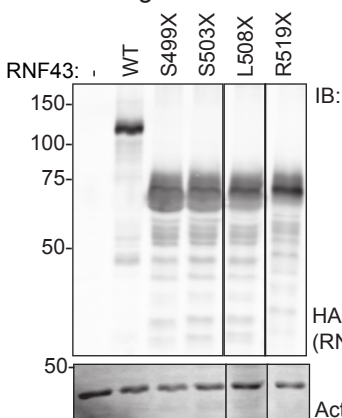

Figure EV4C

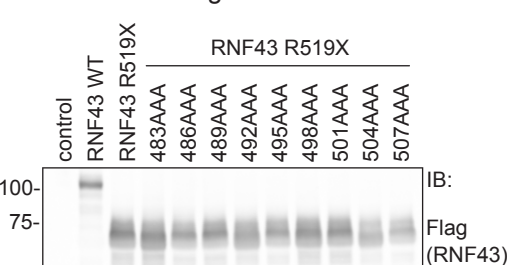

Figure EV4E

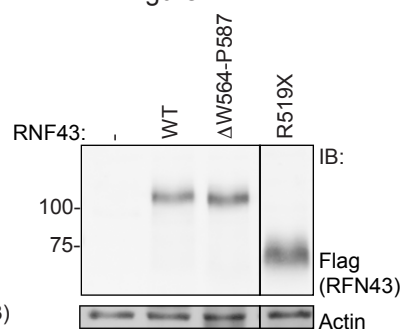

Figure EV4G

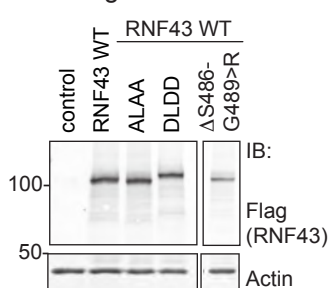

Appendix Figure S1B

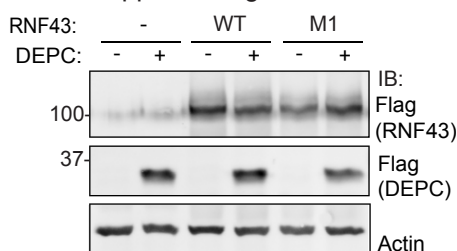

Appendix Figure S1C

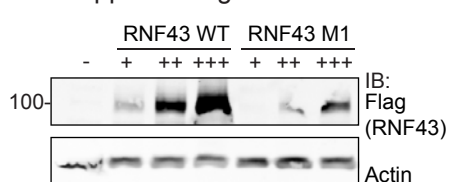

Appendix Fig S4

Western blots for the indicated  $\beta$ -catenin-mediated reporter assays.

**Appendix Table S1. Onco-RNF43 mutations in human tumors.**

| Study                                                        | Sample ID               | Cancer Type                         | Amino acid change | Mutations per sample | Mutations in senescence genes   |
|--------------------------------------------------------------|-------------------------|-------------------------------------|-------------------|----------------------|---------------------------------|
| Breast Invasive Carcinoma (TCGA, Nature 2012)                | TCGA-AN-A04D-01         | Invasive Breast Carcinoma           | K514Sfs*9         | 71                   | RB1 (deep deletion)             |
| TCGA data for Esophagus-Stomach Cancers (TCGA, Nature 2017)  | TCGA-BR-8081-01         | Stomach Adenocarcinoma              | D516Gfs*10        | 946                  | TP53, ATM                       |
| Uterine Corpus Endometrial Carcinoma (TCGA, PanCancer Atlas) | TCGA-D1-A2G0-01         | Uterine Mixed Endometrial Carcinoma | D516Ifs*11        | 817                  | PTEN                            |
| Merged Cohort of LGG and GBM (TCGA, Cell 2016)               | TCGA-HT-7690-01         | Diffuse Glioma                      | R519*             | 15                   | TP53                            |
| Uterine Corpus Endometrial Carcinoma (TCGA, Provisional)     | TCGA-AP-A059-01         | Uterine Endometrioid Carcinoma      | R519*             | 9247                 | TP53, ATM, ATR, RBL1, PTEN      |
| Uterine Corpus Endometrial Carcinoma (TCGA, PanCancer Atlas) | TCGA-AX-A2HD-01         | Uterine Endometrioid Carcinoma      | R519*             | 7855                 | ATM, TP63, RB1, RBL1, ATR, PTEN |
| Uterine Corpus Endometrial Carcinoma (TCGA, PanCancer Atlas) | TCGA-EY-A549-01         | Uterine Endometrioid Carcinoma      | R519*             | 1321                 | TP63, ATR, RB1, PTEN            |
| Colorectal Adenocarcinoma (DFCI, Cell Reports 2016)          | coadread_dfci_2016_2945 | Colorectal Adenocarcinoma           | S525Lfs*172       | 131                  | TP53                            |
| MSK-IMPACT Clinical Sequencing Cohort (MSKCC, Nat Med 2017)  | P-0007969-T01-IM5       | Stomach Adenocarcinoma              | T542Pfs*158       | 46                   | ATR                             |
| Prostate Adenocarcinoma (TCGA, Provisional)                  | TCGA-CH-5746-01         | Prostate Adenocarcinoma             | S546Qfs*50        | 32                   | RBL1 (deep deletion)            |
| Pan-Lung Cancer (TCGA, Nat Genet 2016)                       | TCGA-L9-A7SV-01         | Lung Adenocarcinoma                 | Y558*             | 1341                 | TP53                            |
| MSK-IMPACT Clinical Sequencing Cohort (MSKCC, Nat Med 2017)  | P-0012041-T01-IM5       | Pancreatic Adenocarcinoma           | F562Sfs*138       | 8                    | TP53, ATM, RB1                  |
| Skin Cutaneous Melanoma (TCGA, Provisional)                  | TCGA-EE-A2GJ-06         | Cutaneous Melanoma                  | Q563*             | 928                  | TP53                            |

**Appendix Table S2. List of Wnt destruction complex-associated proteins identified by BioID.**

| ID     | Name                                                                                                            | PD 1   | CTRL 1 | PD 2   | CTRL 2 | PD 3   | CTRL 3 |
|--------|-----------------------------------------------------------------------------------------------------------------|--------|--------|--------|--------|--------|--------|
| Q68DV7 | E3 ubiquitin-protein ligase RNF43<br>OS=Homo sapiens<br>GN=RNF43 PE=1<br>SV=1 -<br>[RNF43_HUMAN]                | 68(68) | -      | 69(69) | -      | 73(73) | -      |
| O14641 | Segment polarity protein dishevelled homolog DVL-2<br>OS=Homo sapiens<br>GN=DVL2 PE=1<br>SV=1 -<br>[DVL2_HUMAN] | 17(18) | -      | 26(27) | -      | 14(14) | -      |
| Q92997 | Segment polarity protein dishevelled homolog DVL-3<br>OS=Homo sapiens<br>GN=DVL3 PE=1<br>SV=2 -<br>[DVL3_HUMAN] | 15(17) | -      | 17(19) | -      | 10(11) | -      |
| O14640 | Segment polarity protein dishevelled homolog DVL-1<br>OS=Homo sapiens<br>GN=DVL1 PE=1<br>SV=2 -<br>[DVL1_HUMAN] | 12(13) | -      | 16(17) | -      | 14(15) | -      |
| P25054 | Adenomatous polyposis coli protein<br>OS=Homo sapiens<br>GN=APC PE=1<br>SV=2 -<br>[APC_HUMAN]                   | 26(26) | -      | 22(22) | -      | 17(17) | -      |
| O15169 | Axin-1 OS=Homo sapiens<br>GN=AXIN1 PE=1 SV=2 -<br>[AXIN1_HUMAN]                                                 | 5(5)   | -      | 9(9)   | -      | 5(5)   | -      |
| P49674 | Casein kinase I isoform epsilon<br>OS=Homo sapiens<br>GN=CSNK1E PE=1<br>SV=1 -<br>[CK1E_HUMAN]                  | 2(2)   | -      | 3(4)   | -      | 2(2)   | -      |
| P48729 | Casein kinase I isoform alpha<br>OS=Homo sapiens<br>GN=CSNK1A1 PE=1<br>SV=2 -<br>[CK1A_HUMAN]                   | 2(2)   | -      | 2(2)   | -      | 2(2)   | -      |

Number of identified unique peptides are shown. Total identified peptides are indicated between brackets. PD, pull down; CTRL, control

**Appendix Table S3. Phosphopeptides identified in RNF43 WT upon stimulation with Wnt3a and Rspo1.**

| Phosphosites | # P | RNF43 WT |       |                 |
|--------------|-----|----------|-------|-----------------|
|              |     | control  | Wnt3a | Wnt3a/<br>Rspo1 |
| S251         | 1   | 5.50     | 5.00  | 5.68            |
| S325         | 1   | 5.76     | 5.22  | 6.25            |
| S443, S446   | 2   | 4.57     | ND    | 5.60            |
| S444         | 1   | 5.11     | 5.13  | 5.93            |
| S532         | 1   | 5.88     | 5.16  | 5.79            |
| S593         | 1   | 7.71     | 7.18  | 7.97            |
| S603, S611   | 2   | 7.02     | 6.84  | 7.47            |
| S611         | 1   | 6.30     | 5.95  | 6.74            |

The table summarizes the intensities of the identified phosphopeptides in the Log<sub>10</sub> scale. Areas of indicated phosphopeptides were normalized based on the median. Non-phosphorylated peptides were used for the second part of normalization.

Phosphosite: position of phosphosite in the RNF43 protein sequence  
 # P: number of phosphorylations observed on the peptide for the specific peptide spectrum match (PSM)  
 ND: not detected



**Appendix Table S4. Phosphopeptides identified in RNF43 WT and R519X upon expression of CK1.**

| Phosphosites     | # P | RNF43 WT  |              |                | RNF43 R519X |              |                |
|------------------|-----|-----------|--------------|----------------|-------------|--------------|----------------|
|                  |     | no kinase | CK1 $\alpha$ | CK1 $\epsilon$ | no kinase   | CK1 $\alpha$ | CK1 $\epsilon$ |
| S241             | 1   | ND        | ND           | ND             | 7.37        | 7.20         | 7.21           |
| S241-T245        | 1   | ND        | ND           | ND             | 6.67        | 6.44         | 6.76           |
| T308             | 1   | ND        | ND           | ND             | 6.93        | 7.07         | 7.21           |
| T317             | 1   | ND        | ND           | ND             | 6.80        | 7.04         | 7.16           |
| S321             | 1   | ND        | ND           | ND             | 8.54        | 8.30         | 8.60           |
| S325             | 1   | 6.65      | 5.85         | 6.32           | 7.23        | 7.10         | 7.40           |
| S323-S325        | 1   | ND        | ND           | ND             | 7.49        | 7.48         | 7.82           |
| S331             | 1   | 5.74      | 6.26         | 5.40           | 7.37        | 7.33         | 7.62           |
| S443-S446        | 2   | 6.48      | 7.45         | 7.12           | 8.45        | 8.36         | 9.05           |
| S446             | 1   | 7.31      | 7.64         | 7.49           | 8.61        | 8.61         | 9.03           |
| S443, S444, S446 | 3   | NQ        | NQ           | NQ             | ND          | NQ           | ND             |
| S499-S503        | 1   | ND        | ND           | ND             | 7.00        | 7.08         | 7.58           |
| S499-S503        | 2   | ND        | ND           | ND             | ND          | 6.14         | 6.28           |
| S512             | 1   | 6.79      | 7.03         | 6.43           | 7.49        | 7.09         | 7.52           |
| S532             | 1   | 8.52      | 8.63         | 8.33           | ND          | ND           | ND             |
| S535             | 1   | 6.47      | 6.83         | 6.31           | ND          | ND           | ND             |
| S532, S535       | 2   | ND        | 7.37         | ND             | ND          | ND           | ND             |
| S525-S535, T539  | 2   | ND        | 6.74         | ND             | ND          | ND           | ND             |
| S607-S611        | 1   | 7.50      | 7.85         | 7.13           | ND          | ND           | ND             |
| S611             | 1   | 6.19      | 6.60         | 6.13           | ND          | ND           | ND             |

The table summarizes the intensities of the identified phosphopeptides in the Log<sub>10</sub> scale. Areas of indicated phosphopeptides were normalized. Phosphopeptide standards added prior to TiO<sub>2</sub> fractionation were used for normalization. Non-phosphorylated peptides were used for the second part of normalization. Individual areas of the phosphopeptides were combined and presented as the total area of each phosphosite.

Phosphosite: position of phosphosite in the RNF43 protein sequence  
 Phosphosites separated by a dash: phosphorylation was detected and occurs on one (or more) amino acids within the listed range, but position cannot be determined with certainty  
 # P: number of phosphorylations observed on the peptide for the specific peptide spectrum match (PSM)  
 ND: not detected  
 NQ: identified, but cannot be quantified  
 In grey: below detection limit, for quality only
